# Supplementary material for: MRI Characteristics Accurately Predict Biochemical Recurrence after Radical Prostatectomy
Source: MDPI journal article supplement (doi:10.3390/jcm9123841), 2020-11-26
Supplement: s1 [file s1]

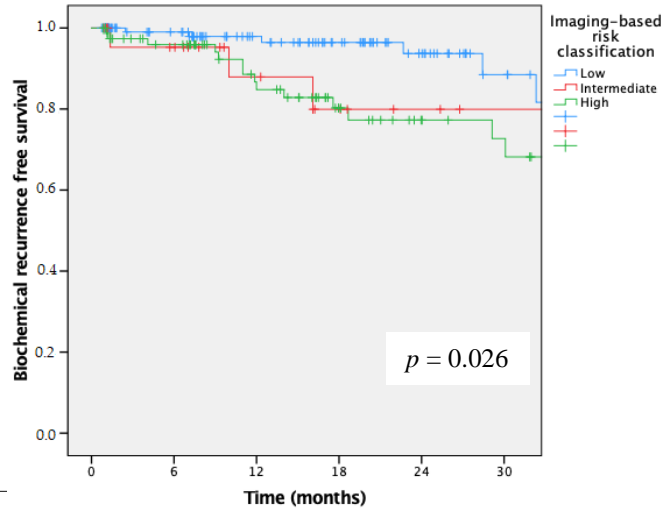

| Number at risk | Time (months) |    |    |    |    |    |
|----------------|---------------|----|----|----|----|----|
|                | 0             | 6  | 12 | 18 | 24 | 30 |
| Low            | 120           | 94 | 67 | 50 | 31 | 16 |
| Intermediate   | 24            | 19 | 12 | 8  | 5  | 3  |
| High           | 78            | 64 | 45 | 28 | 19 | 16 |

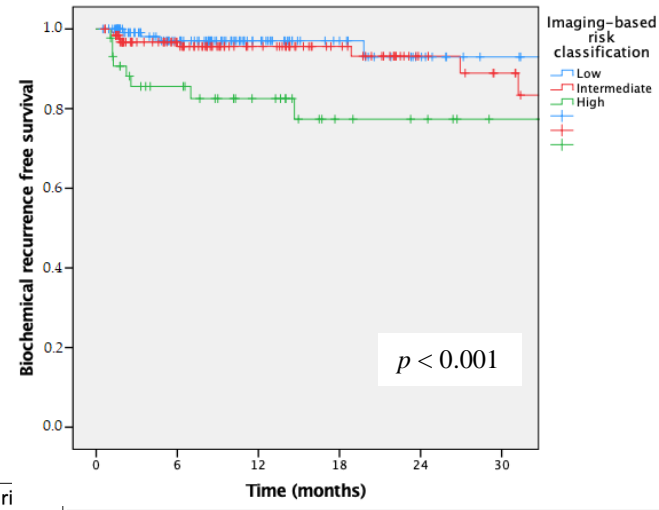

| Number at risk | Time (months) |    |    |    |    |    |
|----------------|---------------|----|----|----|----|----|
|                | 0             | 6  | 12 | 18 | 24 | 30 |
| Low            | 128           | 85 | 45 | 27 | 16 | 9  |
| Intermediate   | 127           | 88 | 58 | 41 | 23 | 18 |
| High           | 44            | 30 | 21 | 11 | 9  | 5  |

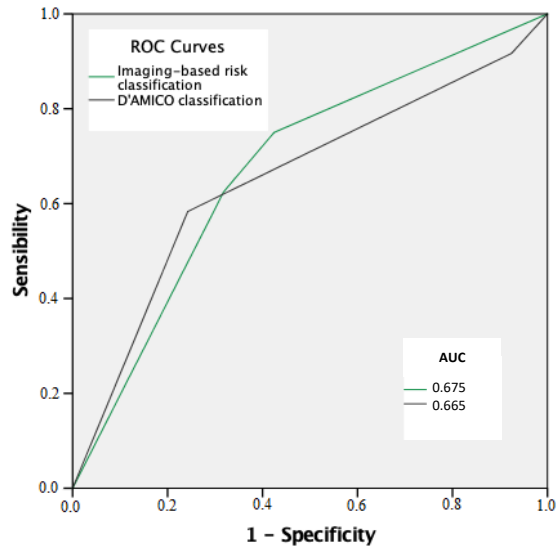

(a) Center 1

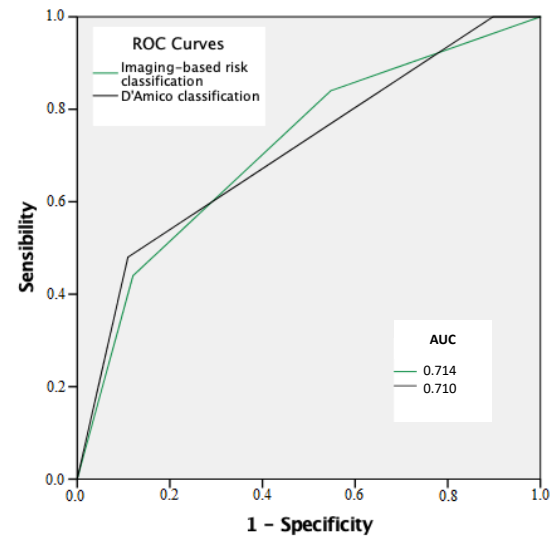

(b) Center 2

Supplementary Figure 1. Imaging-based risk classification in each Center. Above recurrence free survival curve (blue: low risk, red: intermediate risk, green: high risk).
